# Supplementary material
Source: Springer Nature journal article supplement (https://www.springermedizin.de/resource/supplementary/12887_2013_1019_MOESM1_ESM.pdf/9477026)
Supplement: MOESM1 [file 9477026]

### Boys, index group

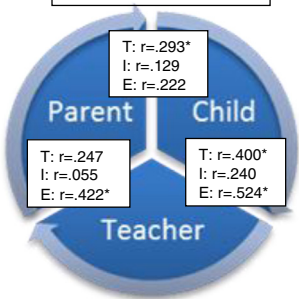

### Girls, index group

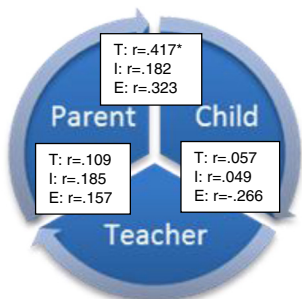

### Boys, reference group

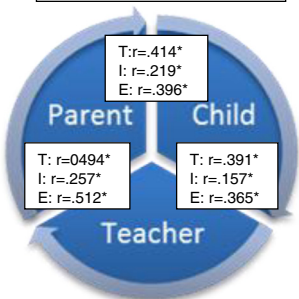

### Girls, reference group

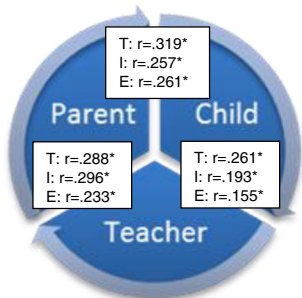

\*= Statistically significant ( $p < 0.05$ )

T= Total problems, I=Internalizing problems, E= Externalizing problems
